# Supplementary material for: Genipin-crosslinked CeO2-incorporating Janus patch for oral ulcer treatment
Source: Royal Society of Chemistry journal article supplement (doi:10.1039/d6ra00275g), 2026-05-18
Supplement: d6ra00275g1.pdf [file d6ra00275g1.pdf]

## Supplementary Information

### Genipin-Crosslinked CeO<sub>2</sub>-Incorporated Janus Patch for Oral Ulcer Treatment

Han Sol Kim,<sup>†a</sup> Sujin Park,<sup>†b</sup> Shazid Md. Sharker,<sup>c</sup> Sang-woo Lee,<sup>\*b,d</sup> and Ji Hyun Ryu,<sup>\*a,e,f,g,h</sup>

<sup>a</sup>Department of Biomedical Materials Science, Graduate School of JABA, Wonkwang University, Iksan, Jeonbuk 54538, Republic of Korea.

<sup>b</sup>Department of Physiology, School of Dentistry and Dental Research Institute, Seoul National University, Seoul 03080, Republic of Korea.

<sup>c</sup>Department of Pharmaceutical Sciences, North South University, Dhaka 1229, Bangladesh

<sup>d</sup>Center for Nanoparticle Research, Institute for Basic Science (IBS), Seoul 08826, Republic of Korea.

<sup>e</sup>Department of Chemical Engineering, Wonkwang University, Iksan, Jeonbuk 54538, Republic of Korea

<sup>f</sup>Department of Carbon Convergence Engineering, Wonkwang University, Iksan, Jeonbuk 54538, Republic of Korea

<sup>g</sup>Department of Chemical Engineering, Smart Convergence Materials Analysis Center, Wonkwang University, Iksan, Jeonbuk 54538, Republic of Korea

<sup>h</sup>Smart Convergence Materials Analysis Center, Wonkwang University, Iksan, Jeonbuk 54538, Republic of Korea

**†These authors contributed equally to this work**

#### **\*Corresponding Authors**

Prof. J. H. Ryu, E-mail: [jhryu4816@wku.ac.kr](mailto:jhryu4816@wku.ac.kr)

Prof. S.-w. Lee, E-mail: [goodman23@snu.ac.kr](mailto:goodman23@snu.ac.kr)

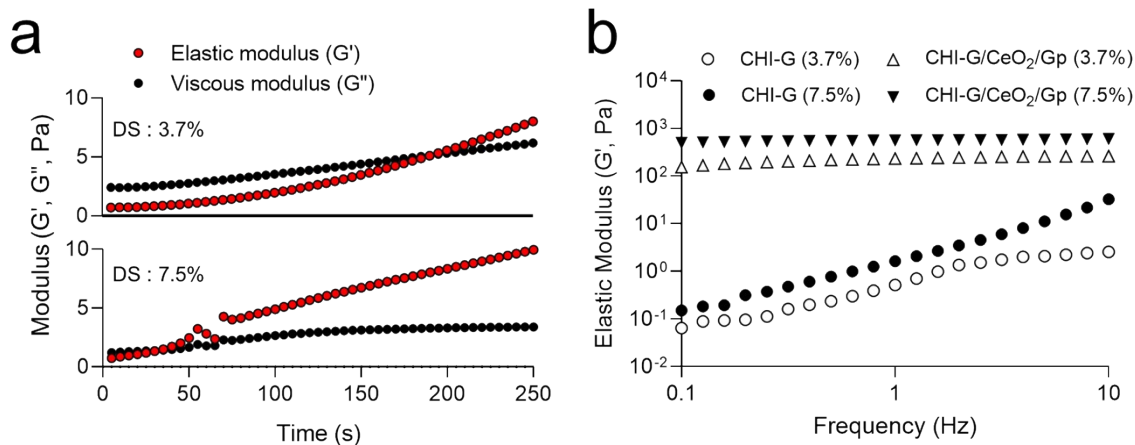

**Figure S1.** (a) Gelation kinetics of CHI-G/CeO<sub>2</sub>/Gp hydrogels prepared from CHI-G with DS (degree of substitution) of 3.7 and 7.5%. (b) Elastic modulus ( $G'$ ) changes of CHI-G (DS=3.7% and 7.5%) solutions and CHI-G/CeO<sub>2</sub>/Gp hydrogels prepared from those CHI-G as a function of frequency.

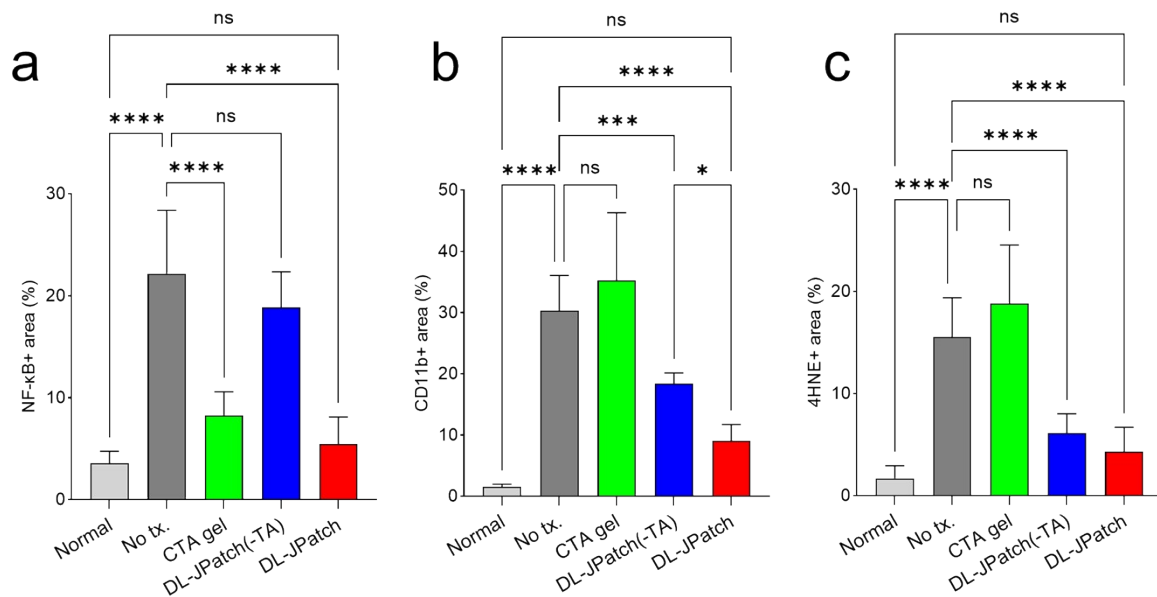

**Figure S2.** (a) Quantified analysis data of NF-κB immunohistochemical staining. ( $n = 8-13$ , ns: no significance, \*\*\*\* $p < 0.0001$ , one-way ANOVA test). (b) Quantified analysis data of CD11b immunohistochemical staining. ( $n = 7-12$ , ns: no significance, \* $p < 0.05$ , \*\*\* $p < 0.001$ , \*\*\*\* $p < 0.0001$ , one-way ANOVA test). (c) Quantified analysis data of 4HNE immunohistochemical staining. ( $n = 9-14$ , ns: no significance, \*\*\*\* $p < 0.0001$ , one-way ANOVA test) All data are means  $\pm$  s.d.

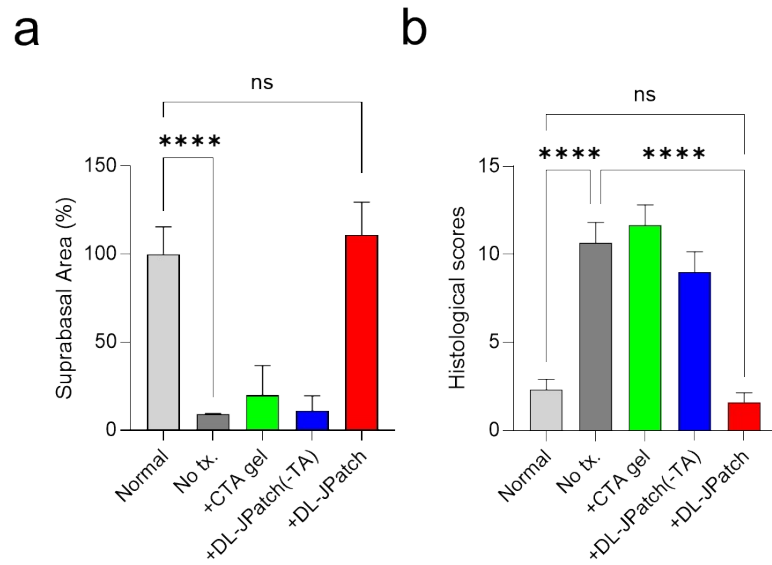

**Figure S3. (a)** Quantified analysis data of CK13 immunohistochemical staining. ( $n = 3-5$ , ns: no significance, \*\*\*\* $p < 0.0001$ , one-way ANOVA test). **(b)** Analysis of histological scores ( $n = 3-5$ , ns: no significance, \*\*\*\* $p < 0.0001$ , one-way ANOVA test). All data are means  $\pm$  s.d.

**Table S1.** Histological analysis of oral ulcers.

| Feature graded            | Grade | Extent (%) |
|---------------------------|-------|------------|
| Mucosal integrity         | 0     | 81 ~ 100   |
|                           | 1     | 61 ~ 80    |
|                           | 2     | 41 ~ 60    |
|                           | 3     | 21 ~ 40    |
|                           | 4     | 0 ~ 20     |
| Inflammatory infiltration | 0     | 0 ~ 8      |
|                           | 1     | 9 ~ 16     |
|                           | 2     | 17 ~ 24    |
|                           | 3     | 25 ~ 32    |
|                           | 4     | 33 ~ 40    |
| Inflammatory signaling    | 0     | 25 ~ 32    |
|                           | 1     | 19 ~ 24    |
|                           | 2     | 13 ~ 18    |
|                           | 3     | 7 ~ 12     |
|                           | 4     | 0 ~ 6      |
| Lipid peroxidation        | 0     | 0 ~ 5      |
|                           | 1     | 6 ~ 10     |
|                           | 2     | 11 ~ 15    |
|                           | 3     | 16 ~ 20    |
|                           | 4     | 21 ~ 26    |

**Table S2.** Results of ICP-MS analysis detecting Ce in major organs.

| <b>Control</b> | <b>Ce</b> | <b>DL-Jpatch</b> | <b>Ce</b> |
|----------------|-----------|------------------|-----------|
| Spleen         | nd        | Spleen           | nd        |
| Liver          | nd        | Liver            | nd        |
| Kidney         | nd        | Kidney           | nd        |
| Heart          | nd        | Heart            | nd        |

\*nd = non detectable ( $\leq 0.1$  ppb), n=3

\*All samples were analyzed three times and averaged.
